# Supplementary material
Source: publisher figshare collection journal article supplement (https://frontiersin.figshare.com/ndownloader/files/14486633)
Supplement: Supplementary file [file 14486633]

**Supplementary Table S5.** Functional classification according to gene ontology (GO) of proteins that were significantly differentially expressed between isogenic embryonal mass (EM) and non-embryogenic callus (NEC) of all three Douglas-fir genotypes. Total number of proteins annotated to each GO term indicated in the first column and corresponding percentage in the second column.

|                                                                     | EM         |             | NEC       |             |
|---------------------------------------------------------------------|------------|-------------|-----------|-------------|
|                                                                     | No         | %           | No        | %           |
| <b>Biological regulation (GO:0065007)</b>                           | <b>7</b>   | <b>2.0</b>  | <b>5</b>  | <b>2.5</b>  |
| <b>Cellular component organization or biogenesis (GO:0071840)</b>   | <b>24</b>  | <b>6.9</b>  | <b>8</b>  | <b>4.0</b>  |
| <b>Cellular process (GO:0009987)</b>                                | <b>83</b>  | <b>24.0</b> | <b>33</b> | <b>16.7</b> |
| <i>Cellular component movement (GO:0006928)</i>                     | 4          | 1.2         | 2         | 1.0         |
| <i>Cytokinesis (GO:0000910)</i>                                     | 2          | 0.6         | 0         | 0.0         |
| <i>Cell cycle (GO:0007049)</i>                                      | 7          | 2.0         | 3         | 1.5         |
| <i>Chromosome segregation (GO:0007059)</i>                          | 4          | 1.2         | 2         | 1.0         |
| <i>Cell communication (GO:0007154)</i>                              | 4          | 1.2         | 3         | 1.5         |
| <b>Developmental process (GO:0032502)</b>                           | <b>3</b>   | <b>0.9</b>  | <b>3</b>  | <b>1.5</b>  |
| <b>Localization (GO:0051179)</b>                                    | <b>34</b>  | <b>9.4</b>  | <b>5</b>  | <b>2.5</b>  |
| <i>Protein localization (GO:0008104)</i>                            | 4          | 1.2         | 0         | 0.0         |
| <i>Transport (GO:0006810)</i>                                       | 34         | 9.8         | 5         | 2.5         |
| <b>Metabolic process (GO:0008152)</b>                               | <b>106</b> | <b>30.6</b> | <b>72</b> | <b>36.4</b> |
| <i>Phosphate-containing compound metabolic process (GO:0006796)</i> | 24         | 6.9         | 2         | 1.0         |
| <i>Biosynthetic process (GO:0009058)</i>                            | 21         | 6.1         | 13        | 6.6         |
| <i>Vitamin metabolic process (GO:0006766)</i>                       | 0          | 0.0         | 3         | 1.5         |
| <i>Primary metabolic process (GO:0044238)</i>                       | 102        | 29.5        | 59        | 29.8        |
| <i>Catabolic process (GO:0009056)</i>                               | 26         | 7.5         | 11        | 5.6         |
| <i>Sulfur compound metabolic process (GO:0006790)</i>               | 6          | 1.7         | 8         | 4.0         |
| <i>Coenzyme metabolic process (GO:0006732)</i>                      | 1          | 0.3         | 6         | 3.0         |
| <i>Nitrogen compound metabolic process (GO:0006807)</i>             | 36         | 10.4        | 14        | 7.1         |
| <i>Generation of precursor metabolites and energy (GO:0006091)</i>  | 5          | 1.4         | 12        | 6.1         |
| <i>Secondary metabolic process (GO:0019748)</i>                     | 1          | 0.3         | 3         | 1.5         |
| <b>Response to stimulus (GO:0050896)</b>                            | <b>8</b>   | <b>2.3</b>  | <b>9</b>  | <b>4.5</b>  |
| <i>Response to stress (GO:0006950)</i>                              | 6          | 1.7         | 8         | 4.0         |
| <i>response to abiotic stimulus (GO:0009628)</i>                    | 1          | 0.3         | 0         | 0.0         |
| <i>Response to endogenous stimulus (GO:0009719)</i>                 | 1          | 0.3         | 0         | 0.0         |
| <i>Immune response (GO:0006955)</i>                                 | 1          | 0.3         | 0         | 0.0         |
| <b>Immune system process (GO:0002376)</b>                           | <b>1</b>   | <b>0.3</b>  | <b>0</b>  | <b>0.0</b>  |
| <b>Unclassified</b>                                                 | <b>80</b>  | <b>23.1</b> | <b>63</b> | <b>31.8</b> |
